# Supplementary material for: Involvement of the Macrophage Migration Inhibitory Factor (MIF) in Lipedema
Source: MDPI journal article supplement (doi:10.3390/metabo13101105), 2023-10-23
Supplement: s1 [file s1]

**Table S1.** Primers used for quantitative real time PCR.

| Gene               | F / R  | Primer sequence 5' – 3'                               |
|--------------------|--------|-------------------------------------------------------|
| human <i>GAPDH</i> | F<br>R | TGGTATCGTGGAAGGACTCATGAC<br>ATGCCAGTGAGCTTCCCGTTCAGC  |
| human <i>hβ2M</i>  | F<br>R | TGTGCTCGCGCTACTCTCTCT<br>CGGATGGATGAAACCCAGACA        |
| human <i>CD74</i>  | F<br>R | AGGTGACTGTCAGTTTGTCC<br>TTCCATCCTGGTGACTCTG           |
| human <i>MIF</i>   | F<br>R | CCGGACAGGGTCTACATCAACTATTAC<br>TAGGCGAAGGTGGAGTTGTTCC |
| human <i>MIF-2</i> | F<br>R | CGCCCACTTCTTTGAGTTTC<br>GGAAGAAGCAGCCAGTTCAC          |

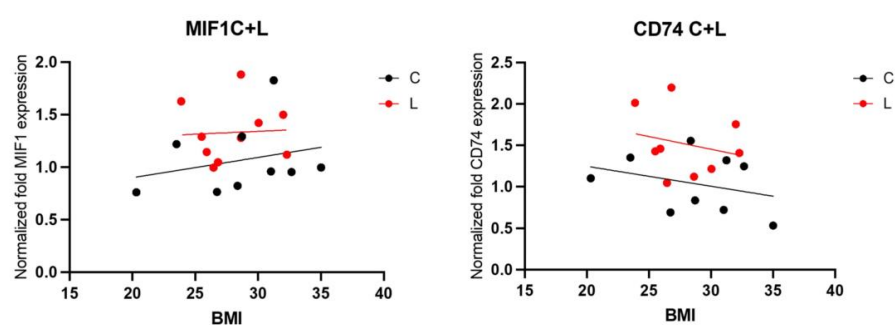

**Figure S1:** The linear regression analysis was performed, and the Pearson correlation coefficient (r) and p-values (two-tailed) were determined to establish if there was a correlation between BMI and MIF-1 as well as CD74. There was no significant correlation between BMI and the RNA expression of MIF-1 and CD74.
